# Supplementary material
Source: HighWire-hosted journal article supplement (https://bmjopen.bmj.com/content/8/2/e018533)
Supplement: inline-supplementary-material-1 [file inline-supplementary-material-1.pdf]

**Table A.** Baseline epidemiological characteristics of people aware of their HIV status notified to the surveillance system by origin, Catalonia, 2001-2013.

|                        | <b>Spanish-born<br/>population</b> | <b>Migrants</b> | <b>Total</b> | <b>P value<sup>a</sup></b> |
|------------------------|------------------------------------|-----------------|--------------|----------------------------|
|                        | n (%)                              | n (%)           | n (%)        |                            |
| <b>HIV cases</b>       | 6089 (59.9)                        | 4061 (40.0)     | 10150 (100)  | <0.001                     |
| <b>Sex</b>             |                                    |                 |              | <0.001                     |
| Men                    | 5073 (83.3)                        | 3062 (75.4)     | 8135 (80.2)  |                            |
| Women                  | 1016 (16.7)                        | 999 (24.6)      | 2015 (19.8)  |                            |
| <b>Age (median)</b>    | 37,00                              | 33,00           | 35,00        | <0.001 <sup>b</sup>        |
| <b>Age group</b>       |                                    |                 |              | <0.001                     |
| <20                    | 79 (1.3)                           | 81 (2.0)        | 160 (1.6)    |                            |
| 20-39                  | 3586 (58.9)                        | 3058 (75.3)     | 6644 (65.4)  |                            |
| 40-49                  | 1443 (23.7)                        | 703 (17.3)      | 2146 (21.2)  |                            |
| >=50                   | 980 (16.10)                        | 219 (5.4)       | 1200 (11.9)  |                            |
| <b>Risk population</b> |                                    |                 |              | <0.001                     |
| PWID                   | 986 (16.2)                         | 276 (6.8)       | 1263 (12.5)  |                            |
| Heterosexual men       | 1206(19.8)                         | 926 (22.8)      | 2132 (21.0)  |                            |
| MSM                    | 2618 (43.0)                        | 1624 (40.0)     | 4243 (41.8)  |                            |
| Heterosexual women     | 737 (12.1)                         | 849 (20.9)      | 1586 (15.6)  |                            |
| Unknown                | 542 (8.9)                          | 386 (9.5)       | 928 (9.1)    |                            |
| <b>Late diagnosis</b>  | 3069 (50.4)                        | 2193 (54.0)     | 5262 (51.8)  | <0.001                     |
| <b>Advanced HIV</b>    | 2003 (32.9)                        | 1336 (32.9)     | 3339 (32.9)  | 0.933                      |

**PWID:** people who inject drugs; **MSM:** men who have sex with men

<sup>a</sup> Pearson's chi-squared test.

<sup>b</sup> Student's t-test.

**Table B.** Comparison of socio-demographic characteristics and clinical features of people enrolled in HIV care (PISCIS cohort), by place and region of origin, Catalonia - Spain, 1998-2013.

|                                            | Spanish-born<br>population | Migrants      | Total        | P value <sup>a</sup> |
|--------------------------------------------|----------------------------|---------------|--------------|----------------------|
|                                            | n (%)                      | n (%)         | n (%)        |                      |
| <b>Total</b>                               | 4194 (69.6)                | 1828 (30.4)   | 6022 (100)   |                      |
| <b>Sex</b>                                 |                            |               |              |                      |
| Men                                        | 3363 (80.2)                | 1466 (80.2)   | 4829 (80.2)  | 1.000                |
| Women                                      | 831 (19.8)                 | 362 (19.8)    | 1193 (19.8)  |                      |
| <b>Age median (IQR)<sup>b</sup></b>        | 37 (31-44)                 | 34 (29-40)    | 36 (30-43)   | <0.001               |
| <b>Risk population*</b>                    |                            |               |              |                      |
| PWID                                       | 1034 (24.7)                | 87 (4.8)      | 1121 (18.6)  | <0.001               |
| MSM                                        | 1786 (42.6)                | 1026 (56.1)   | 2812 (46.7)  |                      |
| Heterosexual women and men                 | 1075 (25.6)                | 624 (34.1)    | 1699 (28.2)  |                      |
| Others                                     | 297 (7.1)                  | 91 (5.0)      | 388 (6.4)    |                      |
| <b>Educational level</b>                   |                            |               |              |                      |
| Primary education or less                  | 1215 (29.0)                | 435 (23.8)    | 1650 (27.4)  | <0.001               |
| Secondary education                        | 795 (19.0)                 | 571 (31.2)    | 1366 (22.7)  |                      |
| Undergraduate education                    | 491 (11.7)                 | 412 (22.5)    | 903 (15.0)   |                      |
| Unknown                                    | 1693 (40.4)                | 410 (22.4)    | 2103 (34.9)  |                      |
| <b>Years on follow up median (IQR)</b>     | 5.5 (2.7-9.4)              | 3.5 (1.5-6.2) | 5.4(2.5-9.5) | <0.001               |
| <b>Number of people on ART</b>             | 3931 (93.7)                | 1659 (90.8)   | 5590 (92.8)  | <0.001               |
| <b>Number of people with suppressed VL</b> | 3655 (87.2)                | 1515 (82.9)   | 5170 (85.8)  | <0.001               |

**PWID:** people who inject drugs; **MSM:** men who have sex with men.

\*Only 2 had an unknown risk group

<sup>a</sup> Pearson's chi-squared test

<sup>b</sup>Student's t-test.
